# Supplementary material for: Comparative proteomic analysis provides new insight into differential transmission of two begomoviruses by a whitefly
Source: Springer Nature journal article supplement (doi:10.1186/s12985-019-1138-4), 2019-03-11

A

## TYLCV vs. un-infected

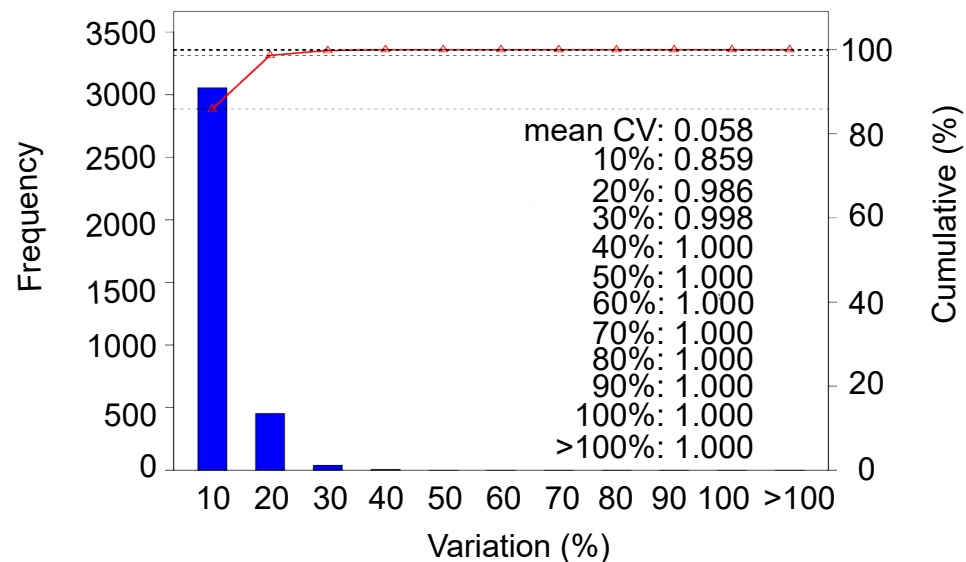

B

## PaLCuCNV vs. un-infected

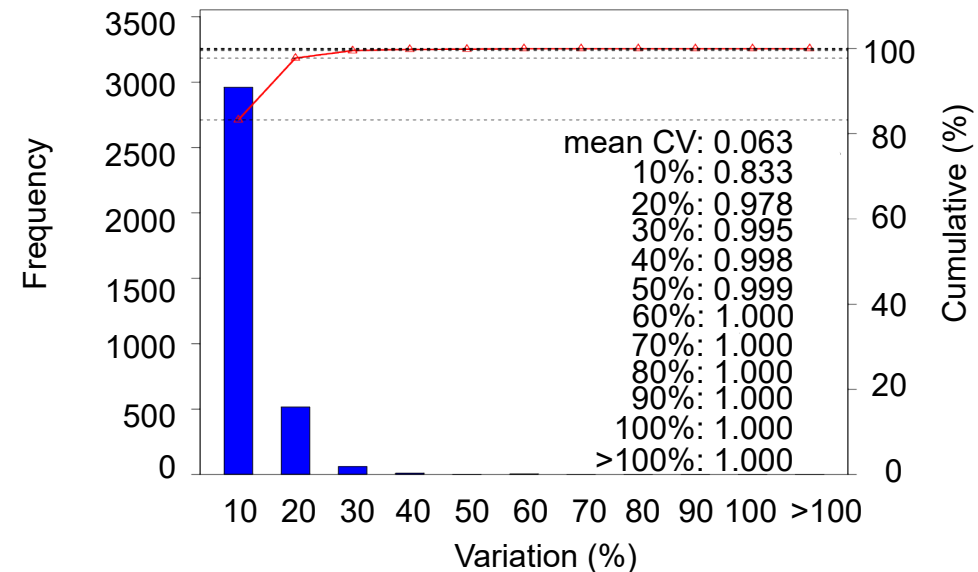

C

## TYLCV vs. PaLCuCNV

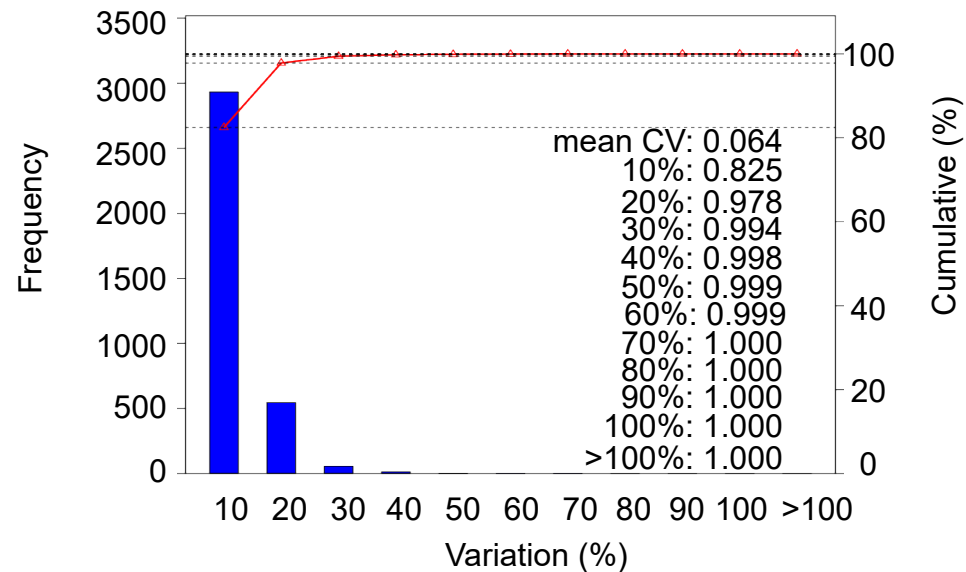

Supplement: MOESM2 [file 16538464]
